# Supplementary material
Source: Springer Nature journal article supplement (https://www.springermedizin.de/resource/supplementary/12950_2012_293_MOESM5_ESM.pdf/9557504)

**A** PRLr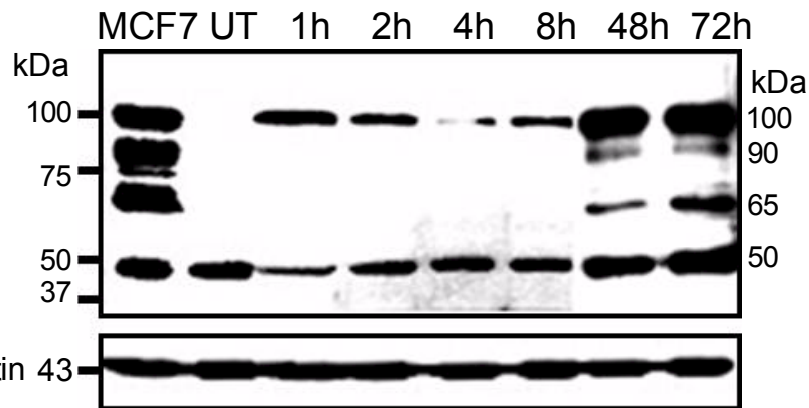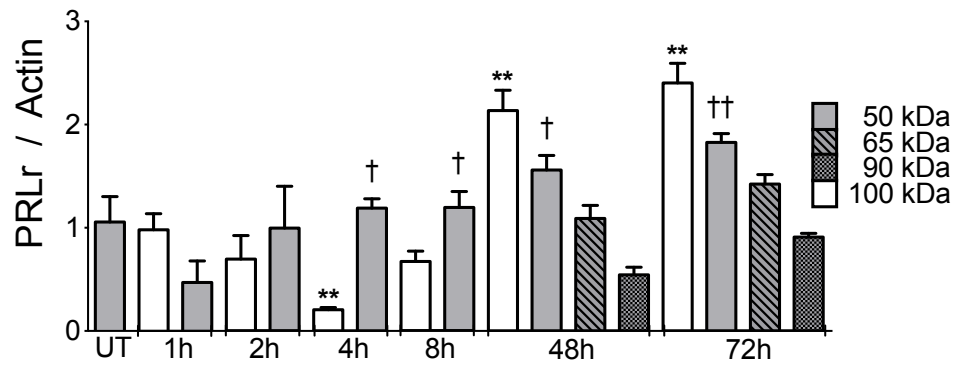**B** PRL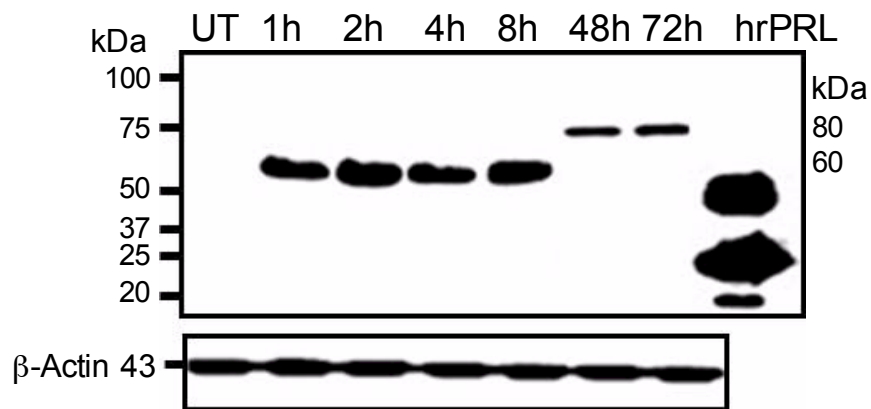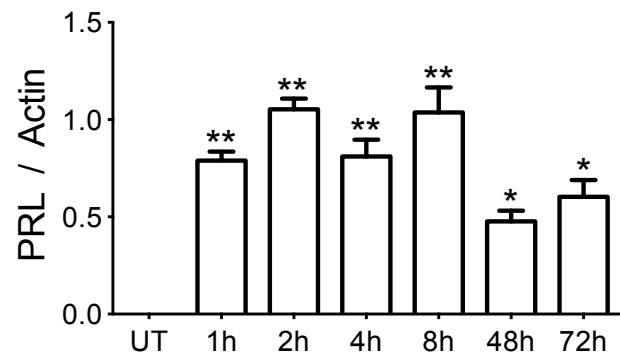

Supplement: MOESM5 [file 9557504]
